# Supplementary material
Source: PubMed Central journal article supplement (PMC8029830)

# Supplementary Figure S1

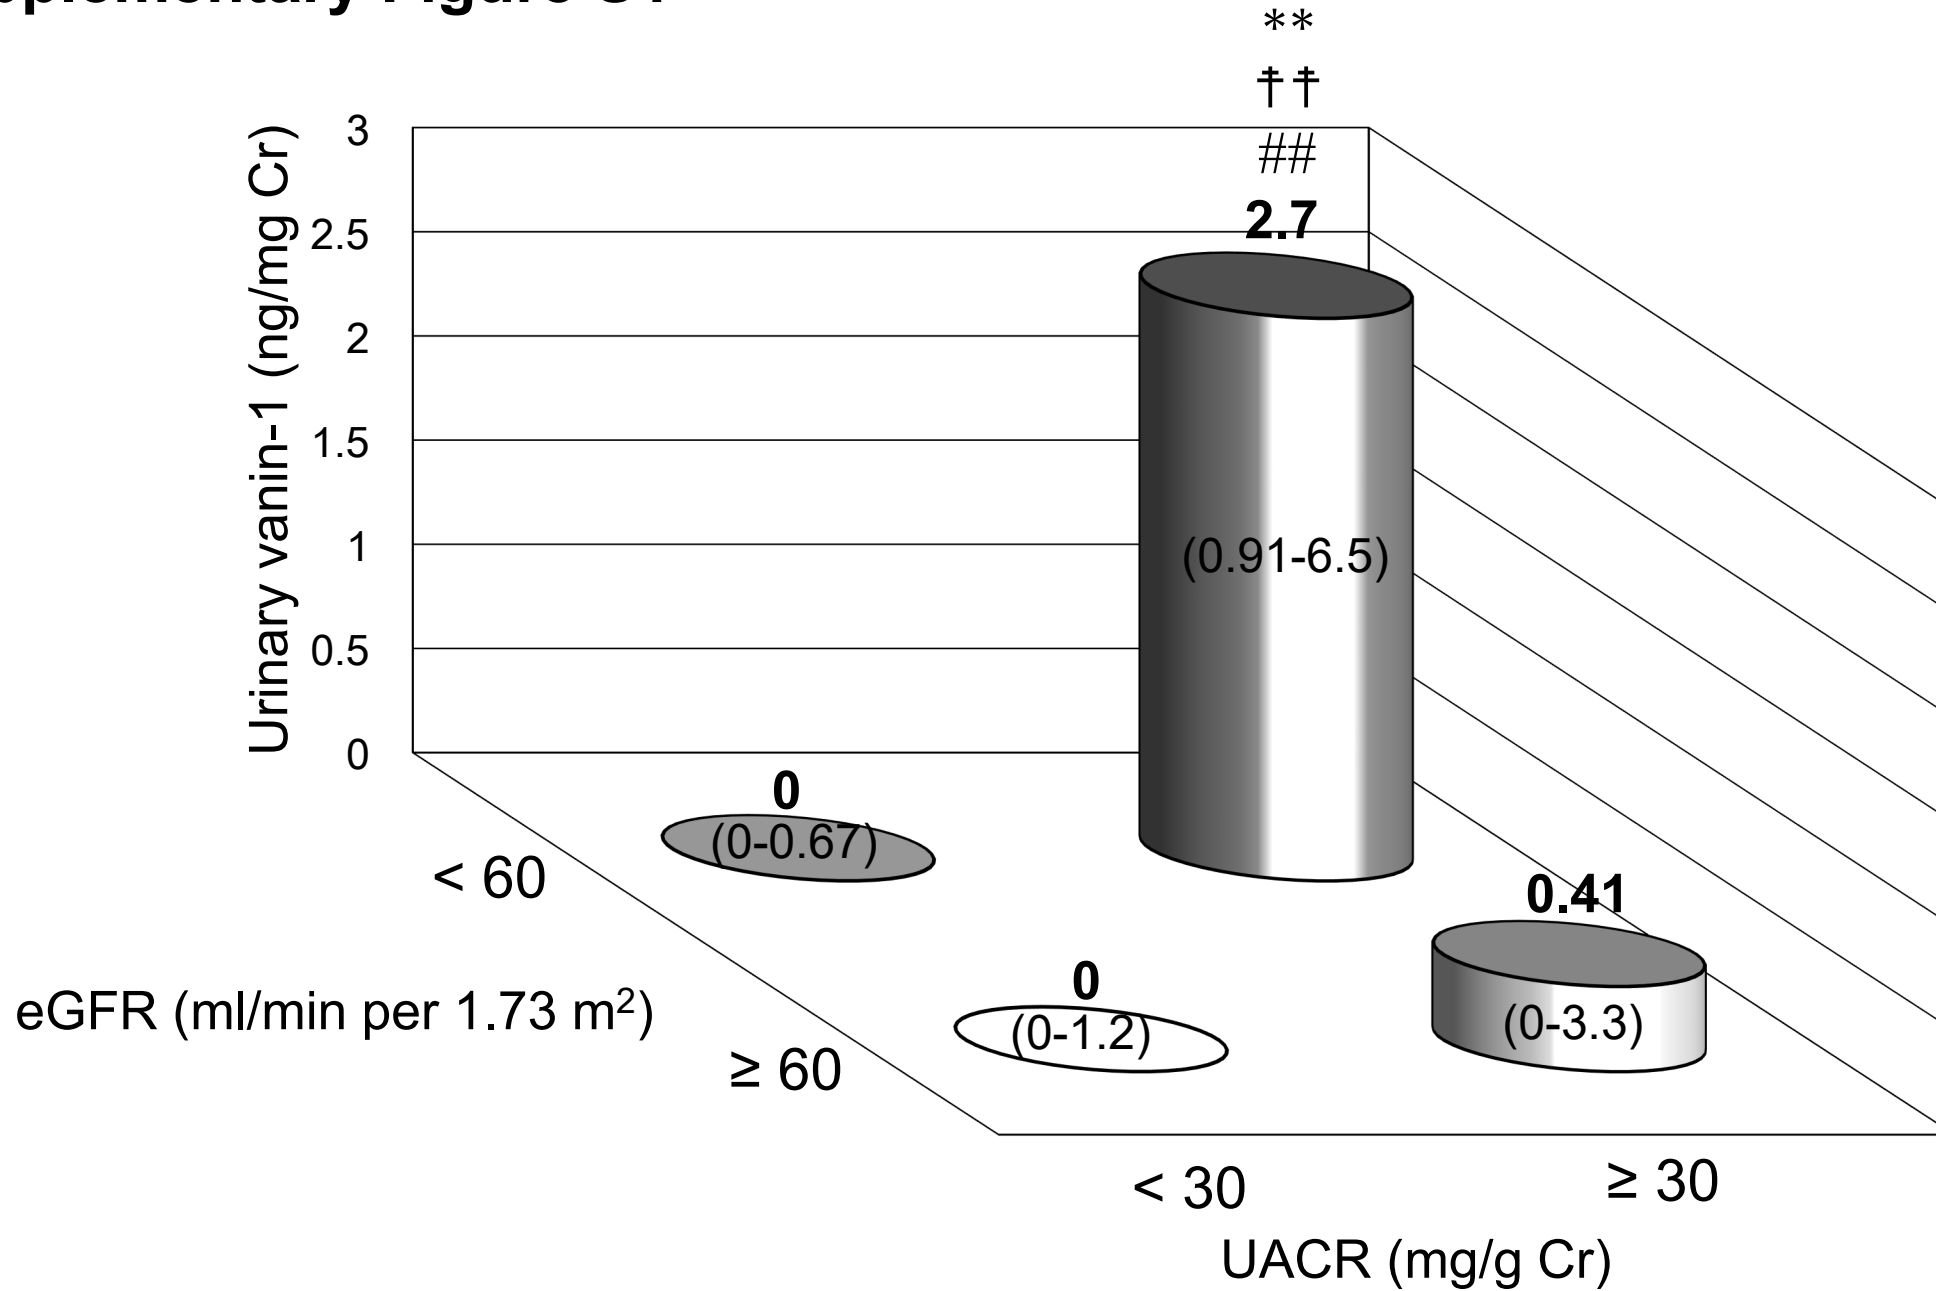

Supplement: JCH-22-1458-s001.pdf [file JCH-22-1458-s001.pdf]
